# Supplementary material
Source: PubMed Central journal article supplement (PMC6634310)
Supplement: NIHMS1040041-supplement-Supplement.pdf [file NIHMS1040041-supplement-Supplement.pdf]

## **KAT6A Syndrome: Genotype-phenotype correlation in 76 patients with pathogenic KAT6A variants**

### Supplementary Materials

Joanna Kennedy, MBBS,<sup>1,2</sup> David Goudie, MbChB<sup>3</sup>, Edward Blair, MBChB<sup>4,5</sup>, Kate Chandler, MD<sup>6</sup>, Shelagh Joss, MBChB, MEd<sup>7</sup>, Victoria McKay, MBBS<sup>8</sup>, Andrew Green, PhD<sup>9,10</sup>, Ruth Armstrong, MSc<sup>11</sup>, Melissa Lees, MD<sup>12</sup>, Benjamin Kamien, MBBS<sup>13</sup>, Bruce Hopper, BSc<sup>13</sup>, Tiong Yang Tan, MBBS, PhD<sup>14,15</sup>, Patrick Yap, MBChB, MSc<sup>14,16</sup>, Zornitza Stark, BMBCh DM<sup>14</sup>, Nobuhiko Okamoto, MD<sup>17,18</sup>, Noriko Miyake, MD, PhD<sup>19</sup>, Naomichi Matsumoto, MD, PhD<sup>19</sup>, Ellen Macnamara, ScM, CGC<sup>20</sup>, Jennifer L. Murphy, RN<sup>20</sup>, Elizabeth McCormick, MS<sup>21</sup>, Hakon Hakonarson, MD, PhD<sup>22</sup>, Marni J. Falk, MD<sup>21</sup>, Dong Li, PhD<sup>22</sup>, Patrick Blackburn, PhD<sup>23</sup>, Eric Klee, PhD<sup>23,24</sup>, Dusica Babovic-Vuksanovic, MD<sup>23,24</sup>, Susan Schelley, MPH<sup>25</sup>, Louanne Hudgins, MD,<sup>25</sup> Sarina Kant, MD, PhD<sup>26</sup>, Bertrand Isidor, MD, PhD<sup>27</sup>, Benjamin Cogne, MD, PhD<sup>27</sup>, Kimberley Bradbury, MRCPCH<sup>28</sup>, Mark Williams, RMIT, FHGSA<sup>29</sup>, Chirag Patel, MBBS, MD<sup>30</sup>, Helen Heussler, MBBS, DM<sup>31</sup>, Celia Duff-Farrier, PhD<sup>32</sup>, Phillis Lakeman, MD PhD<sup>33</sup>, Ingrid Scurr, MBBS<sup>1</sup>, Usha Kini, MD<sup>4,5</sup>, Mariet Elting, MD PhD<sup>34</sup>, Margot Reijnders, MD<sup>35</sup>, Janneke Schuurs-Hoeijmakers, MD, PhD<sup>35</sup>, Mohamed Wafik, MD<sup>4,5</sup>, Anne Blomhoff, MD PhD<sup>36</sup>, Claudia A.L. Ruivenkamp, PhD<sup>37</sup>, Esther Nibbeling, PhD<sup>38</sup>, Alexander J.M. Dingemans, MD<sup>35</sup>, Emilie D. Douine, MS<sup>39</sup>, Stanley F. Nelson, MD<sup>39,40</sup>, The DDD Study<sup>41</sup>, Valerie A. Arboleda, MD PhD<sup>\*39,40</sup>, Ruth Newbury-Ecob, MD<sup>\*1,2</sup>

\*These authors contributed equally to this work

#### Corresponding Authors

Valerie A. Arboleda, MD, PhD  
[varboleda@mednet.ucla.edu](mailto:varboleda@mednet.ucla.edu)

Ruth Newbury-Ecob, MD  
[Ruth.Newbury-Ecob@UHBristol.nhs.uk](mailto:Ruth.Newbury-Ecob@UHBristol.nhs.uk)  
Kennedy J, et al.

| Table 1        |                              |                          |                                 |                             |                                          |
|----------------|------------------------------|--------------------------|---------------------------------|-----------------------------|------------------------------------------|
| Patient number | genomic DNA (GRCh37/hg19)    | coding DNA (NM_006766.3) | protein change (NP_006757.2)    | Exon                        | Inheritance                              |
| 1              | chr8:g.41790230_41790233del  | c.5505_5508del           | p.N1836Lfs*15                   | 17                          | De Novo                                  |
| 2              | chr8:g.41791525C>A           | c.4213G>T                | p.E1405*                        | 17                          | De Novo                                  |
| 3              | chr8:g.41791694_41791695del  | c.4043_4044del           | p.Q1348Rfs*7                    | 17                          | Maternal mosaic                          |
| 4              | chr8:g.41812905delC          | c.1507delG               | p.D503ifs*42                    | 9                           | De Novo                                  |
| 5              | chr8:g.41801291G>A           | c.2203C>T                | p.R735*                         | 13                          | De Novo                                  |
| 6              | chr8:g.41792223delC          | c.3515delG               | p.G1172Dfs*4                    | 17                          | De Novo                                  |
| 7              | chr8:g.41906298_41906301del  | c.195_198del             | p.Asn65Lysfs*15                 | 2                           | De Novo                                  |
| 8              | chr8:g.41839377G>A           | c.805C>T                 | p.R269*                         | 4                           | De Novo                                  |
| 9              | chr8:g.41795071G>A           | c.3055C>T                | p.R1019*                        | 16                          | De Novo                                  |
| 10             | chr8:g.41792357_41794780del  | c.3345_3346insAGTCAGATGA | p.A1116Sfs*11                   | 16                          | De Novo                                  |
| 11             | chr8:g.41791669G>A           | c.4069C>T                | p.Q1357*                        | 17                          | De Novo                                  |
| 12             | chr8:g.41832264_41834580del  | c.1308_1309insCGCAA      | p.Y437Rfs*43                    | 7                           | De Novo                                  |
| 13             | chr8:g.41791481_41791484del  | c.4254_4257del           | p.E1419Wfs*12                   | 17                          | De Novo                                  |
| 14             | chr8:g.41906450del           | c.46del                  | p.A16Pfs*5                      | 2                           | De Novo                                  |
| 15             | chr8:g.41791093C>T           | c.4645G>A                | p.G1549S                        | 17                          | De Novo                                  |
| 16             | chr8:g.41791066T>G           | c.4672A>C                | p.S1558R                        | 17                          | De Novo                                  |
| 17             | chr8:g.41832342T>A           | c.1364-2A>T              | acceptor splice site for exon 8 | 8                           | unknown                                  |
| 18             | chr8:g.41792353G>A           | c.3385C>T                | p.R1129*                        | 17                          | De Novo                                  |
| 19             | chr8:g.41834753G>T           | c.1136C>A                | p.R1129*                        | 7                           | Father deceased, no maternal inheritance |
| 20             | chr8:g.41791696G>A           | c.4042C>T                | p.Q1348*                        | 17                          | De Novo                                  |
| 21             | chr8:g.41795056G>A           | c.3070C>T                | p.R1024*                        | 16                          | De Novo                                  |
| 22             | chr8:g.41792353G>A           | c.3385C>T                | p.R1129*                        | 17                          | De Novo                                  |
| 23             | chr8:g.41838363delC          | c.907+1delG              | Splice site                     | intron_between_exon_5_and_6 | De Novo                                  |
| 24             | chr8:g.41834605_41834606insA | c.1283_1284insT          | p.E429Gfs*7                     | 7                           | De Novo                                  |
| 25             | chr8:g.41791713del           | c.4025del                | p.K1342Rfs*11                   | 17                          | De Novo                                  |
| 26             | chr8:g.41795071G>A           | c.3055C>T                | p.R1019*                        | 16                          | De Novo                                  |
| 27             | chr8:g.41791376dupC          | c.4362dupG               | p.T1455Dfs*9                    | 17                          | De Novo                                  |
| 28             | chr8:g.41834777G>T           | c.1112C>A                | p.S371Y                         | 7                           | maternally inherited                     |
| 29             | chr8:g.41791357G>A           | c.4381C>T                | p.Q1461*                        | 17                          | unknown                                  |
| 30             | chr8:g.41791085A>C           | c.4653T>G                | p.S1551R                        | 17                          | De Novo                                  |
| 31             | chr8:g.41792353G>A           | c.3385C>T                | p.R1129*                        | 17                          | De Novo                                  |
| 32             | chr8:g.41794839_41794840insG | c.3286_3287insC          | p.Cys1096Serfs*6                | 16                          | De Novo                                  |
| 33             | chr8:g.41791464_41791465del  | c.4273_4274del           | p.VAL1425Thrfs*13               | 17                          | unknown                                  |
| 34             | chr8:g.41791506_41791510del  | c.4228_4232del           | p.K1410Gfs*7                    | 17                          | Not tested                               |
| 35             | chr8:g.41794944A>C           | c.3182T>G                | p.L1061*                        | 16                          | De Novo                                  |
| 36             | chr8:g.41795056G>A           | c.3070C>T                | p.R1024*                        | 16                          | De Novo                                  |
| 37             | chr8:g.41798488dupG          | c.2911dupC               | p.Arg971Profs*5                 | 15                          | De Novo                                  |
| 38             | chr8:g.41836254G>A           | c.949C>T                 | p.Arg317*                       | 6                           | De Novo                                  |
| 39             | chr8:g.41805352dupA          | c.1819dupT               | p.Y607Lfs*16                    | 11                          | De Novo                                  |
| 40             | chr8:g.41794840dupA          | c.3286dupT               | p.C1096Lfs*6                    | 16                          | De Novo                                  |
| 41             | chr8:g.41798716G>A           | c.2683C>T                | p.P895S                         | 15                          | De Novo                                  |
| 42             | chr8:g.41792373A>C           | c.3365T>G                | p.Leu1122*                      | 17                          | De Novo                                  |
| 43             | chr8:g.41792077C>A           | c.3661G>T                | p.E1221*                        | 17                          | De Novo                                  |
| 44             | chr8:g.41792304del           | c.3434del                | p.Pro1145Leufs*2                | 17                          | De Novo                                  |
| 45             | chr8:g.41795056G>A           | c.3070C>T                | p.Arg1024*                      | 16                          | De Novo                                  |
| 46             | chr8:g.41792353G>A           | c.3385C>T                | p.Arg1129*                      | 17                          | De Novo                                  |
| 47             | chr8:g.41806840_41806841del  | c.1639_1640del           | p.Met547Glufs*3                 | 10                          | De Novo                                  |
| 48             | chr8:g.41804203C>T           | c.1903-1G>A              | Splice site                     | Intron 11, Exon 12          | De Novo                                  |
| 49             | chr8:g.41906495T>C           | c.1A>G                   | p.M1V                           | Loss of Start Codon         | paternally inherited                     |
| 50             | chr8:g.41906495T>C           | c.1A>G                   | p.M1V                           | Loss of Start Codon         | paternally inherited                     |
| 51             | chr8:g.41834793G>A           | c.1096C>T                | p.Arg366*                       | 7                           | De Novo                                  |
| 52             | chr8:g.41792353G>A           | c.3385C>T                | p.R1129*                        | 17                          | De Novo                                  |

| Previously Reported Cases |                                                |                       |               |                  |                 |
|---------------------------|------------------------------------------------|-----------------------|---------------|------------------|-----------------|
| 53                        | chr8:g.41791858_41791859insG                   | c.3879_3880insC       | p.E1294Rfs*19 | 17               | De Novo         |
| 54                        | chr8:g.41795009_41795010delAGinsTT             | c.3116_3117delCTinsAA | p.S1039*      | 16               | De Novo         |
| 55                        | chr8:g.41795009_41795010delAGinsTT             | c.3116_3117delCTinsAA | p.S1039*      | 16               | De Novo         |
| 56                        | chr8:g.41791445_41791446insG                   | c.4292_4293insC       | p.L1431Ffs*8  | 17               | De Novo         |
| 57                        | chr8:g.41791630C>A                             | c.4108G>T             | p.E1370*      | 17               | De Novo         |
| 58                        | chr8:g.41791906_41791907insCT                  | c.3831_3832insAG      | p.R1278Sfs*17 | 17               | De Novo         |
| 59                        | arr 8p11.21 (41,786,230-42,022,328) exons 1-18 |                       |               | deletion of gene | De Novo         |
| 60                        | chr8:g.41792353G>A                             | c.3385C>T             | p.R1129*      | 17               | De Novo         |
| 61                        | chr8:g.41792353G>A                             | c.3385C>T             | p.R1129*      | 17               | De Novo         |
| 62                        | chr8:g.41795056G>A                             | c.3070C>T             | p.R1024*      | 16               | De Novo         |
| 63                        | chr8:g.41792353G>A                             | c.3385C>T             | p.R1129*      | 17               | De Novo         |
| 64                        | chr8:g.41792275delC                            | c.3464delG            | p.G1155Afs*21 | 17               | De Novo         |
| 65                        | chr8:g.41794839delC                            | c.3287delG            | p.C1096Ffs*27 | 16               | De Novo         |
| 66                        | chr8:g.41794899delT                            | c.3230delA            | p.N1077Mfs*46 | 16               | De Novo         |
| 67                        | chr8:g.41795056G>A                             | c.3070C>T             | p.R1024*      | 16               | De Novo         |
| 68                        | chr8:g.41804177T>C                             | c.1928A>G             | p.N643S       | 12               | De Novo         |
| 69                        | chr8:g.41937569_41937570delCT                  | c.3040-1_3040delGA    | splice site   | [16]             | De Novo         |
| 70                        | chr8:g.41791886_41791887dupCC                  | c.3851_3852dupGG      | p.Q1285Gfs*10 | 17               | De Novo         |
| 71                        | chr8:g.41791049A>T                             | c.4689T>A             | p.Y1563*      | 17               | De Novo         |
| 72                        | chr8:g.41906261G>A                             | c.235C>T              | p.R79*        | 2                | De Novo         |
| 73                        | chr8:g.41792081_41792083                       | c.3655_3657           | p.L1219Tfs*75 | 17               | De Novo         |
| 74                        | chr8:g.41795056G>A                             | c.3070C>T             | p.R1024*      | 16               | germline mosaic |
| 75                        | chr8:g.41795056G>A                             | c.3070C>T             | p.R1024*      | 16               | germline mosaic |
| 76                        | chr8:g.41795056G>A                             | c.3070C>T             | p.R1024*      | 16               | germline mosaic |

**Supplemental Table 1: Reported genetic Mutations in *KAT6A* in our cohort of 76**

**individuals.** If known, inheritance of mutation was provided.

|                                                                     |    |    |    |    |    |    |    |    |    |    |    |    |    |    |    |    |     |     |    |    |    |    |     |   |    |    |
|---------------------------------------------------------------------|----|----|----|----|----|----|----|----|----|----|----|----|----|----|----|----|-----|-----|----|----|----|----|-----|---|----|----|
| Sex                                                                 | F  | F  | F  | M  | M  | M  | F  | M  | F  | F  | M  | F  | F  | M  | M  | M  | M   | M   | F  | M  | F  | M  | F   | M | F  | M  |
| Age (years)                                                         | 16 | 8  | 18 | 9  | 9  | 5  | 21 | 23 | 15 | 7  | 11 | 9  | 4  | 5  | 13 | 23 | 14  | 7   | 30 | 10 | 7  | 9  | 8   | 5 | 9  | 9  |
| Mutation type                                                       | fs | n  | fs | fs | n  | fs | fs | n  | n  | fs | n  | fs | fs | fs | m  | m  | S   | n   | n  | n  | n  | n  | s   | n | fs | n  |
| Exon (for splice site cases in=intron)                              | 17 | 17 | 17 | 9  | 13 | 17 | 2  | 4  | 16 | 16 | 17 | 7  | 8  | 2  | 17 | 2  | In7 | 17  | 7  | 17 | 16 | 17 | In5 | 7 | 17 | 16 |
| Collection route<br>C=clinician<br>P=patient/family<br>L=literature | c  | c  | c  | c  | c  | c  | c  | c  | c  | c  | c  | c  | c  | c  | c  | c  | c   | c   | c  | c  | c  | c  | p   | P | p  | c  |
| SGA                                                                 | -  | -  | -  | -  | -  | -  | -  | ?  | -  | -  | -  | -  | -  | -  | -  | -  | -   | -   | -  | -  | -  | -  | -   | - | -  | -  |
| Microcephaly                                                        | -  | ?  | +  | -  | -  | ?  | -  | -  | -  | -  | +  | -  | -  | -  | ?  | -  | -   | +   | -  | -  | +  | -  | -   | - | -  | +  |
| Presence/Degree of ID*                                              | 2  | 2  | 3  | 1  | 1  | 3  | 1  | 1  | 2  | 3  | 3  | 1  | 2  | 1  | 3  | 2  | 2   | 2/3 | 1  | ?  | 3  | 3  | 2   | + | +  | 3  |
| Neonatal Hypotonia                                                  | +  | +  | -  | -  | +  | +  | -  | -  | +  | +  | ?  | -  | -  | +  | +  | -  | +   | +   | -  | +  | +  | +  | +   | - | +  | +  |
| Seizures                                                            | -  | -  | -  | -  | -  | -  | -  | -  | -  | -  | -  | +  | -  | -  | +  | -  | +   | -   | -  | -  | -  | -  | -   | - | -  | -  |
| Speech delay                                                        | +  | +  | +  | +  | +  | +  | +  | +  | +  | +  | +  | +  | +  | +  | +  | +  | +   | +   | +  | +  | +  | +  | +   | + | +  | +  |
| Strabismus                                                          | +  | +  | -  | -  | -  | +  | -  | -  | -  | +  | +  | +  | -  | +  | ?  | +  | ?   | +   | +  | -  | -  | -  | +   | + | +  | -  |
| Ptosis                                                              | -  | -  | -  | -  | +  | -  | -  | -  | ?  | -  | -  | -  | -  | -  | -  | -  | -   | -   | -  | -  | +  | -  | -   | + | -  | -  |
| Visual Defect                                                       | ?  | +  | +  | -  | +  | +  | -  | -  | +  | ?  | +  | +  | -  | +  | ?  | -  | ?   | +   | +  | -  | +  | +  | +   | + | +  | +  |
| Broad nasal tip                                                     | +  | +  | +  | +  | +  | +  | +  | +  | +  | +  | +  | +  | +  | -  | +  | +  | +   | +   | +  | ?  | +  | +  | -   | - | ?  | +  |
| Thin upper lip                                                      | +  | +  | +  | +  | +  | +  | -  | -  | +  | +  | +  | +  | +  | -  | ?  | +  | +   | -   | +  | ?  | ?  | +  | +   | - | ?  | +  |
| Feeding difficulties                                                | +  | +  | +  | +  | +  | +  | -  | -  | +  | +  | +  | -  | +  | +  | +  | +  | ?   | +   | +  | +  | +  | -  | +   | + | +  | -  |
| Reflux                                                              | +  | +  | -  | +  | -  | +  | -  | -  | +  | ?  | -  | -  | +  | -  | -  | +  | ?   | -   | +  | ?  | -  | -  | +   | + | +  | -  |
| Constipation                                                        | ?  | +  | -  | +  | -  | ?  | -  | -  | +  | +  | -  | -  | +  | -  | +  | +  | ?   | +   | -  | ?  | -  | +  | +   | - | -  | +  |
| Congenital heart defect                                             | -  | -  | +  | -  | +  | +  | -  | -  | -  | +  | -  | +  | +  | -  | -  | -  | -   | +   | +  | +  | -  | +  | +   | + | +  | +  |
| Frequent Infection                                                  | +  | +  | +  | -  | -  | -  | +  | -  | +  | +  | +  | -  | +  | -  | -  | -  | +   | +   | -  | +  | -  | +  | ?   | + | -  | +  |
| Behavioural problems                                                | ?  | +  | +  | -  | -  | -  | -  | +  | -  | +  | +  | -  | +  | -  | +  | +  | +   | -   | -  | ?  | -  | +  | -   | - | -  | +  |
| Sleep disturbance                                                   | -  | +  | +  | +  | -  | +  | -  | -  | -  | ?  | +  | -  | +  | -  | +  | +  | -   | -   | -  | +  | -  | +  | ?   | + | +  | -  |

| Feature                                       | Patient Number |    |    |    |    |    |    |    |    |    |    |    |    |    |    |    |    |    |    |    |    |      |     |     |    |    |
|-----------------------------------------------|----------------|----|----|----|----|----|----|----|----|----|----|----|----|----|----|----|----|----|----|----|----|------|-----|-----|----|----|
| Patient number                                | 27             | 28 | 29 | 30 | 31 | 32 | 33 | 34 | 35 | 36 | 37 | 38 | 39 | 40 | 41 | 42 | 43 | 44 | 45 | 46 | 47 | 48   | 49  | 50  | 51 | 52 |
| Sex                                           | M              | F  | F  | M  | F  | M  | M  | F  | M  | F  | F  | M  | F  | M  | M  | M  | M  | F  | F  | F  | F  | F    | M   | M   | M  | M  |
| Age (years)                                   | 3              | 4  | 1  | 2  | 5  | 2  | 7  | 8  | 9  | 1  | 22 | 21 | 2  | 12 | 6  | 3  | 1  | 5  | 18 | 5  | 7  | 19   | 8   | 20  | 4  | 3  |
| Mutation type                                 | fs             | m  | n  | m  | n  | fs | fs | fs | n  | n  | fs | n  | Fs | fs | m  | n  | N  | fs | n  | n  | fs | s    | fs' | fs' | n  | n  |
| Exon (for splice site cases in=intron)        | 17             | 7  | 17 | 17 | 17 | 16 | 17 | 17 | 16 | 16 | 15 | 6  | 11 | 16 | 15 | 17 | 17 | 17 | 16 | 17 | 10 | ln11 | 1   | 1   | 7  | 17 |
| Collection route C=clinician P=patient/family | p              | p  | p  | p  | p  | p  | p  | p  | p  | p  | c  | c  | P  | p  | p  | c  | P  | c  | c  | c  | c  | c    | C   | C   | C  | C  |
| SGA                                           | -              | -  | +  | ?  | -  | -  | +  | +  | -  | +  | -  | +  | +  | -  | -  | +  | -  | -  | -  | -  | -  | ?    | ?   | -   | -  |    |
| Microcephaly (A=acquired)                     | -              | -  | ?  | +  | +  | -  | -  | -  | -  | -  | -  | -  | -  | ?  | -  | +  | +  | +A | -  | +A | -  | ?    | -   | -   | -  | +  |
| Presence/Degree of ID*                        | +              | ?  | +  | ?  | ?  | +  | ?  | 1  | +  | ?  | 1  | 1  | 1  | +  | +  | 2  | ?  | 3  | 3  | 3  | 1  | 2    | 2   | 3   | 2  | 3  |
| Neonatal Hypotonia                            | +              | +  | +  | +  | +  | -  | +  | +  | -  | +  | -  | +  | +  | -  | +  | +  | +  | +  | +  | -  | +  | +    | -   | -   | +  | +  |
| Seizures                                      | -              | -  | -  | -  | -  | -  | -  | -  | -  | -  | -  | -  | -  | -  | -  | -  | -  | -  | -  | ?  | +  | -    | -   | -   | -  |    |
| Speech delay                                  | +              | +  | ?  | ?  | +  | ?  | +  | +  | +  | ?  | +  | +  | +  | +  | +  | +  | +  | +  | +  | +  | +  | +    | +   | +   | +  |    |
| Strabismus                                    | +              | -  | +  | -  | -  | -  | +  | +  | +  | -  | -  | +  | ?  | -  | -  | -  | -  | +  | +  | +  | +  | ?    | -   | +   | +  |    |
| Ptosis                                        | +              | -  | -  | -  | ?  | -  | -  | -  | -  | -  | -  | -  | -  | -  | -  | -  | -  | -  | -  | ?  | -  | +    | -   | -   | -  |    |
| Visual Defect                                 | +              | -  | -  | +  | +  | -  | +  | -  | +  | -  | +  | -  | -  | -  | ?  | +  | +  | +  | -  | ?  | +  | +    | -   | -   | +  | +  |
| Broad nasal tip                               | +              | -  | -  | -  | +  | -  | -  | -  | +  | -  | +  | +  | +  | ?  | ?  | +  | +  | +  | +  | +  | +  | +    | +   | +   | +  | +  |
| Thin upper lip                                | +              | -  | -  | -  | +  | +  | -  | -  | +  | -  | -  | -  | ?  | ?  | ?  | +  | +  | +  | -  | -  | +  | +    | -   | -   | -  |    |
| Feeding difficulties                          | +              | +  | +  | +  | +  | +  | +  | -  | -  | +  | -  | +  | +  | +  | -  | +  | +  | +  | +  | +  | -  | +    | -   | -   | +  | +  |
| Reflux                                        | +              | +  | +  | +  | +  | +  | +  | -  | -  | +  | -  | +  | +  | +  | -  | +  | +  | +  | +  | +  | -  | -    | -   | -   | -  | -  |
| Constipation                                  | +              | -  | -  | +  | +  | +  | +  | +  | +  | -  | -  | -  | -  | +  | -  | +  | -  | +  | ?  | ?  | +  | +    | -   | +   | -  | -  |
| Congenital heart defect                       | +              | -  | -  | -  | +  | -  | +  | +  | -  | +  | -  | -  | -  | -  | -  | +  | +  | +  | -  | +  | -  | -    | -   | -   | -  | +  |
| Frequent Infection                            | +              | +  | ?  | -  | +  | -  | +  | -  | -  | -  | -  | +  | +  | -  | -  | +  | +  | -  | ?  | -  | -  | -    | -   | -   | -  | +  |
| Behavioural problems                          | ?              | ?  | ?  | ?  | ?  | ?  | ?  | ?  | ?  | ?  | +  | +  | -  | ?  | +  | -  | ?  | -  | -  | -  | -  | -    | -   | -   | ?  | ?  |
| Sleep disturbance                             | +              | -  | ?  | -  | -  | -  | +  | -  | -  | +  | -  | -  | -  | -  | ?  | +  | +  | -  | ?  | ?  | -  | -    | -   | -   | -  | -  |

| Feature                                                                 | Patient Number |         |         |         |         |         |         |         |         |         |         |         |         |         |         |         |         |          |          |          |         |         |         |         |
|-------------------------------------------------------------------------|----------------|---------|---------|---------|---------|---------|---------|---------|---------|---------|---------|---------|---------|---------|---------|---------|---------|----------|----------|----------|---------|---------|---------|---------|
| Patient number                                                          | 53             | 54      | 55      | 56      | 57      | 58      | 59      | 60      | 61      | 62      | 63      | 64      | 65      | 66      | 67      | 68      | 69      | 70       | 71       | 72       | 73      | 74      | 75      | 76      |
| Sex                                                                     | F              | F       | F       | M       | F       | M       | M       | M       | F       | M       | F       | F       | M       | F       | F       | F       | M       | F        | F        | M        | F       | M       | M       | M       |
| Age (years)                                                             | 5              | 12      | D       | 3       | 8       | 4       | 19      | 5       | 5       | 7       | 6       | 3       | 10      | 12      | 6       | 7       | 30      | 5        | 10       | 3        | 3       | 14      | 11      | 1       |
| Mutation type                                                           | fs             | n       | n       | fs      | n       | fs      | del     | n       | n       | n       | n       | fs      | fs      | fs      | n       | m       | S       | n        | n        | Fs       | fs      | n       | n       | n       |
| Exon (for splice site cases in=intron)                                  | 17             | 16      | 16      | 17      | 17      | 17      | 1-17    | 17      | 17      | 16      | 17      | 17      | 17      | 17      | 16      | 12      | 16      | 17       | 2        | 17       | 17      | 16      | 16      | 16      |
| Collection route C=clinician P=patient/family L=literature <sup>2</sup> | L<br>T1        | L<br>T2 | L<br>T3 | L<br>T4 | L<br>T5 | L<br>T6 | L<br>T7 | L<br>A1 | L<br>A2 | L<br>A3 | L<br>A4 | L<br>M1 | L<br>M2 | L<br>M3 | L<br>M4 | L<br>M5 | L<br>M6 | L<br>GV1 | L<br>ZS1 | L<br>MU1 | L<br>E1 | L<br>S1 | L<br>S2 | L<br>S3 |
| SGA                                                                     | -              | -       | -       | -       | -       | -       | -       | -       | -       | +       | -       | ?       | ?       | ?       | ?       | ?       | ?       | -        | -        | -        | +       | +       | -       | -       |
| Microcephaly                                                            | +              | -       | -       | -       | -       | +       | +       | +       | +       | +       | +       | +       | -       | -       | -       | -       | -       | -        | -        | +        | +       | -       | -       | -       |
| Presence/Degree of ID*                                                  | +              | +       | +       | +       | +       | +       | 1       | +       | +       | +       | +       | +       | +       | +       | +       | +       | +       | +        | 1        | +        | +       | +       | +       | +       |
| Neonatal Hypotonia                                                      | +              | +       | +       | +       | +       | +       | +       | +       | -       | +       | +       | +       | +       | -       | +       | +       | +       | +        | +        | +        | +       | +       | +       | +       |
| Seizures                                                                | -              | -       | +       | -       | -       | +       | -       | -       | -       | -       | -       | -       | -       | -       | -       | -       | +       | -        | ?        | -        | -       | -       | -       | -       |
| Speech delay                                                            | +              | +       | +       | +       | +       | +       | +       | +       | +       | +       | +       | +       | +       | +       | +       | +       | +       | +        | +        | +        | +       | +       | +       | ?       |
| Strabismus                                                              | -              | +       | +       | -       | +       | -       | +       | +       | +       | +       | -       | -       | -       | -       | -       | -       | -       | +        | -        | +        | +       | +       | +       | ?       |
| Ptosis                                                                  | -              | +       | +       | -       | -       | -       | -       | -       | -       | +       | +       | -       | -       | -       | +       | -       | -       | -        | +        | +        | -       | -       | -       | -       |
| Visual Defect                                                           | -              | -       | -       | -       | +       | +       | +       | ?       | ?       | +       | +       | ?       | ?       | ?       | ?       | ?       | ?       | +        | ?        | +        | +       | +       | -       | ?       |
| Broad nasal tip                                                         | +              | +       | +       | +       | +       | +       | +       | +       | +       | ?       | +       | +       | +       | ?       | +       | +       | +       | +        | +        | +        | +       | ?       | ?       | ?       |
| Thin upper lip                                                          | +              | +       | +       | +       | +       | +       | +       | +       | +       | ?       | +       | +       | +       | ?       | ?       | +       | +       | +        | -        | -        | +       | ?       | ?       | ?       |
| Feeding difficulties                                                    | +              | +       | +       | +       | -       | +       | -       | +       | +       | +       | -       | ?       | +       | +       | ?       | -       | ?       | +        | +        | +        | +       | +       | +       | +       |
| Reflux                                                                  | ?              | ?       | ?       | ?       | -       | ?       | -       | +       | +       | +       | -       | +       | +       | +       | +       | -       | +       | +        | +        | +        | +       | +       | ?       | ?       |
| Constipation                                                            | ?              | ?       | ?       | ?       | ?       | ?       | ?       | ?       | ?       | ?       | ?       | -       | +       | +       | -       | -       | -       | ?        | ?        | ?        | +       | ?       | ?       | ?       |
| Congenital heart defect                                                 | +              | +       | +       | +       | +       | -       | -       | +       | +       | -       | +       | +       | +       | -       | +       | -       | -       | -        | -        | +        | +       | ?       | ?       | +       |
| Frequent Infection                                                      | ?              | ?       | ?       | ?       | ?       | ?       | ?       | +       | +       | -       | +       | ?       | +       | ?       | ?       | ?       | ?       | -        | ?        | ?        | +       | ?       | +       | ?       |
| Behavioural problems                                                    | ?              | ?       | ?       | ?       | ?       | ?       | ?       | ?       | +       | ?       | ?       | ?       | ?       | ?       | ?       | ?       | +       | +        | ?        | ?        | -       | ?       | ?       | ?       |
| Sleep disturbance                                                       | ?              | ?       | ?       | ?       | ?       | ?       | ?       | +       | ?       | ?       | +       | ?       | ?       | ?       | ?       | ?       | ?       | -        | ?        | ?        | +       | ?       | ?       | ?       |

**Supplemental Table 2:** Complete Summary Table individual level data of phenotypic features. <sup>1</sup>In cases 49 and 50 the start codon ATG is changed to GTG, the nearest ATG's (both before and after) are out of frame so this would be predicted to result in a frameshift, <sup>2</sup>The literature codes refer to the first initial of the first author and the given patient number in the paper reporting each individual. **The references for each paper are also indicated at the end of this file.**  
T=[1], A = [2], M=[3] GV=[4] , MU=[5], E =[6] ,ZS =[7], S=[8]

### Supplemental Table 3: List of additional features found in patients

*Patient Further details and features of note*

*Number*

- | <i>Number</i> | <i>Further details and features of note</i>                                                                                                                                                                                                                                                                                                                                                                                                                                                                                                                                                                                                                                                                                                                                                                                                                                        |
|---------------|------------------------------------------------------------------------------------------------------------------------------------------------------------------------------------------------------------------------------------------------------------------------------------------------------------------------------------------------------------------------------------------------------------------------------------------------------------------------------------------------------------------------------------------------------------------------------------------------------------------------------------------------------------------------------------------------------------------------------------------------------------------------------------------------------------------------------------------------------------------------------------|
| 1             | Strabismus required surgery, bilateral 5th finger clinodactyly, possible absent lacrimal duct on right, persistent thrombocytopenia since birth. Used signs as communication aid.                                                                                                                                                                                                                                                                                                                                                                                                                                                                                                                                                                                                                                                                                                  |
| 2             | Sensory issues (doesn't like loud noises, likes and dislikes certain textures) Hand flapping and chews when anxious. Found to be aspirating feeds at 1 year, thickeners helped. Delayed visual maturation, myopia, occasional strabismus. Initial MRI scan showed the corpus collosum was mildly thinned, delayed myelination was noted but has since resolved. Used mackaton signs as communication aid. B cell immunodeficiency and hypogammaglobulinaemia, cyclical neutropenia (low IgG, low mannan-binding, IgA low, CD3 and CD4 low, poor response to pneumococcal vaccine) on subcutaneous immunoglobulins. IV Immunoglobulin therapy 3 weekly for Common Variable Immune Disease (CVID). Chronic fatigue. Severe ear infections and permanent perforated ear drums. Frequent respiratory tract infections and reactive airway disease. On Melatonin for sleep dysfunction. |
| 3             | Sociable, happy as young child; anxious+++ and aggressive as teenager; chews e.g. blankets, straps; hand flaps when excited. Episodes of "inappropriate laughter" and hand-flapping. Significant speech delay, only uses a few words at 17yrs. Intermittent strabismus, glasses for refractory correction. Bilateral 5th finger camptodactyly. ASD did not require surgery. Hypothyroidism. On Melatonin for sleep dysfunction.                                                                                                                                                                                                                                                                                                                                                                                                                                                    |
| 4             | Persistent swallowing difficulties well beyond infancy. He vomits up to an hour and a half after eating. Right inguinal hernia repaired aged 9 weeks. Significant articulation difficulties, receptive language assessed as within normal range.                                                                                                                                                                                                                                                                                                                                                                                                                                                                                                                                                                                                                                   |
| 5             | PDA present at 7 years. Hypermetropia. Bilateral cervical ribs. Used signs as communication aid but now has good verbal vocabulary. Bilateral conductive hearing loss, grommets and hearing aids.                                                                                                                                                                                                                                                                                                                                                                                                                                                                                                                                                                                                                                                                                  |
| 6             | Uses a PECS board as communication aid. Poor oral-oesophageal co-ordination and a gut motility disorder. Surgery as infant for duodenal web and malrotation. Mild pulmonary stenosis. Bilateral undescended testes requiring surgery. Cortical visual impairment.                                                                                                                                                                                                                                                                                                                                                                                                                                                                                                                                                                                                                  |
| 7             | Mostly extensive herpes simplex infections, involving the face and eyes (keratitis) requiring valaciclovir prophylaxis                                                                                                                                                                                                                                                                                                                                                                                                                                                                                                                                                                                                                                                                                                                                                             |
| 8             | Features of autism and attention deficit disorder.                                                                                                                                                                                                                                                                                                                                                                                                                                                                                                                                                                                                                                                                                                                                                                                                                                 |
| 9             | Supernumerary teeth. Right sided conductive hearing loss (has frequent ear infections). Registered partially sighted due to photophobia. Significant speech delay, mainly uses signs.                                                                                                                                                                                                                                                                                                                                                                                                                                                                                                                                                                                                                                                                                              |
| 10            | Autistic features. Unable to walk at 6 years. No meaningful speech. Oculomotor apraxia. Plagiocephally. Kyphosis. ASD and PDA requiring surgery at 2 years. Conductive hearing loss, grommets inserted.                                                                                                                                                                                                                                                                                                                                                                                                                                                                                                                                                                                                                                                                            |
| 11            | Oromotor dysfunction, uses Makaton and own signs, Age 11 less than 10 words, understanding said to be good. Left amblyopia. Mild plagiocephaly, bitemporal narrowing, prominent columella. Testosterone undetectable. Bilateral cryptorchidism with bilateral orchidopexy Poorly formed scrotum. Unilateral 5th finger clinodactyly. Latent horizontal nystagmus. Hypermetropia. Given booster immunisations as low immune response mounted to HiB and pneumococcal vaccine. Igs normal levels. Minimal tears. Drooling is a significant problem. Doesn't like sunlight. Protects his eyes, and walks with head down.                                                                                                                                                                                                                                                              |



- 12 Had several complex partial seizures seizure between the ages of two to three. An EEG performed at age 2 was normal. Single word speech started at 2years. VSD which did not require surgery. Strabismus, treated with patching from age three, she has residual amblyopia. Myopia. 5th finger clinodactyly.
- 13 Left pre-auricular pit. Lower incisors very delayed to appear and pointy. Supernumerary nipple, raised ridge down centre of tongue. Mild LPA stenosis, small PFO, small PDA.
- 14 Sagittal Craniosynostosis. Horse shoe kidney. Amblyopia.
- 15 High palate. Small teeth.
- 16 Autistic features. Inappropriate laughter. Delayed myelination noted on MRI brain. Right convergent squint when tired. T shaped incisor teeth. Supernumerary nipples. Significant problems with reflux continued well after infancy, regurgitation of food up to an hour after eating. Brachydactyly and tapering fingers. Prominent costal cartilages on the left side of the chest.
- 17 Autistic features (borderline diagnosis of autism) Possibility of ADHD considered. Behaviour described as challenging and unpredictable. Hysterical uncontrolled laughing at times when younger. Absences with abnormal EEG. Oromotor dyspraxia, articulation difficulties with dysphonic voice. Habitual clearing of throat. Slightly up slanting palpebral fissures. Right preauricular pit. Sub-mucosal cleft palate. Recurrent ear infections.
- 18 MRI showed delayed myelination and thin corpus collosum. Bilateral esotropia with increasing myopia. Small posteriorly rotated ears with extra folding. Retromicrognathia. High arched thin palate. Small peg shaped teeth. Bi temporal narrowing. Primitive oral motor co-ordination. Difficulty chewing. Episodes of choking. ASD and PDA not causing significant haemodynamic compromise. Bilateral cryptorchidism requiring surgery, hypospadias. Chronic serous otitis media and cough prior to bilateral myringotomy with tympanostomy tube placement. Mild to moderate hearing loss, combination of conductive and sensory neural. Bilateral esotropia, myopia, astigmatism. Progressive scoliosis and torticollis to the left. He had multiple contractures and was diagnosed with arthrogryposis multiplex congenita. Most prominent involvement was the hands and feet, but the hips knees and elbows were also contracted. Hands were initially held in flexion with fisting present bilaterally. They can, though, be taken to the neutral position. His hands have ulnar deviation bilaterally. Long fingers and mild camptodactyly.
- 19 4 words at 4 years, now speaks in full sentences. Had a fundoplication (severe GERD/reflux) and G/J tube placement for 1 year. ASD required surgical repair, Mild mitral and tricuspid regurgitation. Accessory pancreas removed. Reactive airway disease, requires oxygen at night. Iron deficiency anaemia, on supplements. Hashimoto's thyroiditis, diabetes, unclear whether type one or type two due to unusual clinical features, clinical team considering whether intermittent elevated BS should be treated with once a week insulin.
- 20 Diagnosed clinically with a mitochondrial disorder. Although his muscle biopsy electron transport chain analysis was not diagnostic, his multi-system disorder with persistent elevations in pyruvate and abnormal mitochondrial on muscle electron microscopy placed him in a category of a definite disorder of mitochondrial metabolism (based on the modified Walker criteria). MRI brain shows mild, non-specific findings of delayed myelination with periventricular white matter changes. Absent speech at 4 years. Feeding difficulties and growth failure lead to gastrostomy. Large atrial septal defect. Cardiomyopathy. Hypogammaglobulinaemia. Central

- obstructive sleep apnoea.
- 21 Blepharophimosis, low set and posteriorly rotated ears, hypermetropia.
- 22 Acquired microcephaly, required 3x neurosurgery (3rd ventriculostomy at 11 months, Chiari decompression at 23 months, tethered cord repair at 3 years, 3 months) Note-regression was noted prior to surgeries which is not generally seen in KAT6A syndrome. MRI brain showed variant venous anatomy including anomalous venous sinus that traverses the falx cerebri; overall pattern suggests a much greater than typical fraction of the venous return is via anterior pathways. End gaze nystagmus, blue tinted sclera, palpebral fissure R 27mm L 27mm; significant lower lid lagophthalmos; upper lid skin was thin with eyelid vasculature showing; dry eye syndrome, myopia with astigmatism. Small teeth, short teeth with enamel dysplasia. Mandibular midline displaced to right. Mild pectus carinatum and narrow hypotonic shoulder girdle, low set wide spaced nipples, small accessory nipples medial and inferior to primary nipples. Small bowel obstruction with necrosis of 5cm resection of ileum. PFO resolved, ASD. Mild to moderate hearing loss in right ear; etiology unknown. Small fingers and toes with tapering appearance, persistent fetal pads, bilateral simian crease, hypoplastic nails, contractures of 3.4.5 fingers bilaterally, pes planus. Skeletal abnormalities include kyphosis, mild lateral curve of spine, small sacral pit; beaten copper skull, thick skull, slightly thick clavicles, cervical spine and rib anomalies, slightly advanced bone age
- 23 No speech at 3.5 years. Low set ears with thick helices. High palate. Incisor notching. Unilateral talipes equinovarus. Hypermetropia. Congenital hip dysplasia.
- 24 Fundoplication, Gastro-jejunal tube placement for 1 year. ASD requiring surgical repair. Mild mitral and tricuspid regurgitation. Supraventricular tachycardia at 8 weeks, on propranolol. Infection of site after muscle biopsy, for 8 weeks post biopsy.
- 25 Some behavioural difficulties, difficulty maintaining focus, sensory issues. Frequent gagging and vomiting in early years. Immature chewing and possibly a slow swallow reflex. ASD required repair. Central obstructive sleep apnoea. Several allergies.
- 26 Some behavioural difficulties, difficulty maintaining focus, sensory issues. First word "mama" at 7 years, can sight read but only says 4 words, communicates with adaptive technology. Left preauricular ear pit, thick helices. Repaired sagittal craniosynostosis, micrognathia, prominent sagittal suture ridge and flat occiput. PDA required closure at 12 mo, hypoplastic left pulmonary vein leading to severe pulmonary hypertension with chronic lung disease. Moderate hydronephrosis. Lymphopenia in first year of life. Recurrent infections.
- 27 Low set rotated ears. Small jaw. Widely spaced nipples. Asymmetry of facial features. ASD, VSD, PDA, surgically corrected. Nephrocalcinosis. Chronic otitis media requiring grommets, Severe RSV associated pneumonia requiring hospitalisation for 29 days.
- 28 Low set ears. Small teeth.
- 29 Low set ears. Small jaw. Wide set nipples. Dysphagia. Blocked tear ducts.
- 30 NICU for 2 weeks, traceobronchomalacia. Microcephaly. Plagiocephaly. Frontal bossing. Dysphagia. Moderate to mild sensory neural hearing loss.
- 31 Slight thinning of the corpus callosum. Dysphagia. Chronic otitis media requiring grommets.
- 32 Astigmatism.
- 33 MRI showed Hydrocephalus Slit Ventricles Stiff Ventricles, Hyperintense signals in the brain, Chiari Malformation. Low set ears and ear tags. Wide spaced nipples. Craniosynostosis. Dysphagia. Eosinophilic esophagitis. Gastrostomy and gastrostomy-

- jejunostomy required at times. ASD. Cardiomyopathy and an enlarged ascending aorta, requiring surgery. Blocked tear ducts. Atlanto-Axial Instability/Dislocation C1 bone was not developed fully (bipartite and splayed). Interstitial Lung Disease, chronic Respiratory Failure, Restrictive Lung Disease, Tracheomalacia. Central obstructive sleep apnoea. Bone marrow failures after RSV infection requiring platelet and red blood cell transfusions. Persistent oxygen requirement following RSV infection.
- 34 MRI showed delayed myelination. Low set ears with ear tags. Dysphagia. PFO which resolved.
- 35 Autism. Malabsorption. Iron deficiency. Amblyopia and astigmatism. Inguinal hernia repair.
- 36 Cleft Palate and small jaw. VSD. Pulmonary hypertension. Gastrostomy and GI dysmotility. Central obstructive sleep apnoea.
- 37 Vocal cord paresis secondary to abnormal tracheal rings. Sporadic anger outbursts. Small deep-set eyes, small palpebral fissures, epicanthus fold as a child. Mild Hypertelorism. Myopia. Tracheomalacia. Bronchial hyper reactivity.
- 38 Autism. Didn't speak until 6 years of age, nasal speech. Synophris. Small palpebral fissures and deep-set eyes. Crowding of the teeth. Broad forehead and prominent chin. Gastrostomy required. Growth retardation in younger years. Small hands. Recurrent otitis media.
- 39 Dysphagia. Gagging/retching/vomiting.
- 40 Abnormal teeth.
- 41 Sensory processing disorder. Lack of myelination noted on initial MRI which has since resolved. Hydronephrosis. Myopia and Astigmatism. Blocked tear ducts. C1 bone was not fully developed (bipartite and splayed).
- 42 MRI findings: Borderline type 1 chiari malformation, bilateral trigone choroid plexus cyst. No specific features on MRI to explain DD. Thin arched eyebrows. Low set, posteriorly rotated ears. Surgical intervention for bowel malrotation, umbilical hernia, drooling, mild iron deficient anaemia, cow's milk protein intolerance. ASD requiring surgical closure. Unilateral orchidopexy surgery to correct malrotation. Bi-lateral inguinal hernia repair. Recurrent otitis media requiring grommets. Unilateral overlapping 2nd toe. Broad big toes. Left single palmer crease. Dysplastic nails. Eczema.
- 43 Microcephaly. Required gastrostomy. Dysphagia. ASD and PDA. Undescended testes requiring double orchidopexy. Craniosynostosis. Required intubation for two viral respiratory tract infections. Tracheomalacia. Obstructive sleep apnoea.
- 44 Acquired microcephaly. Four limb dystonia. Low set ears. Required NG feeding for first 5mths of life. ASD. Astigmatism. Intermittent esotropia. Coxa vara deformity of the hips. Reduced sweating.
- 45 Non-verbal into adulthood. Surgically corrected strabismus. Low set, posteriorly rotated ears. High palate. Severe reflux. Multiple episodes of aspiration pneumonia. Chronic lung disease. Oxygen dependent 9 weeks from birth.
- 46 Staring episodes, no grand mal seizures. Low lying cerebellar tonsils (query Arnold-Chiari type I malformation). Severely delayed speech. Crumpled ears with pre-auricular pits. Dilated foetal bowel loops, Recurrent bilious vomiting, Severe GER, Diagnosed with gastroesophageal nerve impairment. GI Procedures: Gastro-juenostomy, Nissen fundoplication. Anal stenosis. Acute bowel obstruction that required 3 laparotomies. She had GI failure and parents decided to transfer her to Hospice care where she passed away. Patent ductus arteriosus (PDA) and large

- secondum atrial septal defect (ASD). Bilateral fetal hydronephrosis.
- 47 Absence seizures and eye myoclonia, classified as Jeavons epilepsy. Verbal dysplasia, understanding much better than speech, articulation difficulties. One extra tooth noted, large incisors. Brachydactyly, mild clinodactyly. Some striped of hyperpigmentation.
- 48 Synophrys. Ptosis. Coarse face. Prominent chin. Short broad neck. Tapering fingers. Hypermetropia. Amblyopia in the left eye. Talipes of the left foot.
- 49 Hypertelorism. Pre-auricular ear pit. Flat nasal bridge. Talipes.
- 50 A few words at 10 years, mainly signs. Ears have over folded helices. Prominent central upper incisors. Curved toes. Tapering fingers.
- 51 Hyperactive, reduced attention span. MRI-Bilateral periventricular hyperintense signals in T2, notably in trigonum. Severe speech and language delay, spoke only few words at age of 2 years and 10 months, high pitched voice. Hypertelorism, strabismus, small palpebral fissures, periorbital fullness. Open appearance, full lips, tending upper vermilion. High arched palate. Large upper incisors. Microretrogenia, clinodactyly digit V both hands. Tube feeding in neonatal period, at age of 2 years and 10 months only pureed food. Severe failure to thrive in first 2 years of life. Hyperopia. Biochemical abnormalities; Elevated lactate and glycine in CSF, elevated glutamine, arginine and ornithine in blood, elevated GAG in urine.
- 52 Slightly increased nuchal translucency. Postnatal apnea-bradycardia syndrome. Delayed myelination seen on MRI. Ataxic movement pattern. Head control at 1 year, rolls and crawls, still not able to sit unsupported at the age of 37 months. Vocalises, no words at 3 years. Secondary microcephaly, brachycephaly. Discrete protrusion of the bulbi, swollen eyelids, intermittent esotropia. High-arched palate. Prominent forehead, increased intermamillar distance. ASD (surgical procedure planned). Mitral valve prolapse (surgical procedure planned), enlarged right ventricle. Prominent renal pelvis. Small scrotum. Bilateral inguinal hernias requiring surgery. Myopia (-6 dioptres), astigmatism. Frequent upper respiratory tract infections. Hyper-responsive bronchial system, bronchial asthma, impaired mucociliary clearance, bronchomalacia.
- T1 Craniosynostosis. Large, low set, posteriorly rotated ears. Patent ductus arteriosus. Atrial septal defect. Clinodactyly. Widely spaced nipples/
- T2 Craniosynostosis. Large, low set posteriorly rotated ears. Patent ductus arteriosus. Atrial septal defect. Pre-auricular pits. Required gastrostomy.
- T3 Sudden death at 10 years. Recurrent craniosynostosis. Large, low set posteriorly rotated ears. Patent ductus arteriosus. Patent foramen ovale. Required gastrostomy. Seizures with EEG changes.
- T4 Low set posteriorly rotated ears. Nasolacrimal stenosis. Patent ductus arteriosus, atrial septal defect, ventricular septal defect. Hypospadias. Pre-auricular pits. Widely spaced nipples. Peg shaped teeth. Bilateral grade 2 brain haemorrhages at 7 days which fully resolved. Large anterior fontanel.
- T5 Atrial septal defect. Patent ductus arteriosus. Suspected cortical visual impairment. Epicanthal folds. Clinodactyly. Left single palmar crease.
- T6 Plagiocephaly. Suspected cortical visual impairment. Bilateral single palmar creases. Low set posteriorly rotated ears. Required gastrostomy. Transient infantile spasms which responded to ACTH.
- T7 Posteriorly rotated ears. Hypermetropia. Crowded abnormally shaped teeth.
- A1 Sleep apnoea. Epicanthal fold. Atrial septal defect. Broncho- or laryngomalacia. Chronic lung disease. Dystonia. Required gastrostomy. Recurrent aspiration pneumonias. Brachydactyly.

|     |                                                                                                                                                                                                                                                                                                                                                                                                                                                 |
|-----|-------------------------------------------------------------------------------------------------------------------------------------------------------------------------------------------------------------------------------------------------------------------------------------------------------------------------------------------------------------------------------------------------------------------------------------------------|
| A2  | Cleft palate. Large upper canines. Ventricular septal defect. Intestinal malrotation. Hydronephrosis. Left hand flexed PIP. Bronchomalacia. Recurrent urinary tract, ear and respiratory infections. Autism.                                                                                                                                                                                                                                    |
| A3  | Bifid tip to the nose. Small peg shaped lower teeth. Epicanthic folds. Optic nerve atrophy. Cryptorchidism. Brachydactyly.                                                                                                                                                                                                                                                                                                                      |
| A4  | Myopia. Atrial septal defect. Dystonia. Chronic ear infections requiring grommets.                                                                                                                                                                                                                                                                                                                                                              |
| M1  | ASD, mild mitral valve prolapse. Failure to thrive. Coarse facial features. Small dysplastic ears with a right pre-auricular sinus. Supernumerary left nipple.                                                                                                                                                                                                                                                                                  |
| M2  | Right sided cryptorchidism requiring orchiopexy. Recurrent otitis media with eardrum perforation. Chronic cough. Large posteriorly rotated ears. Narrow palate. Mitral valve prolapse with regurgitation.                                                                                                                                                                                                                                       |
| M3  | Two early episodes of febrile illnesses associated with poor feeding and developmental regression. Hypotelorism.                                                                                                                                                                                                                                                                                                                                |
| M4  | Patent foramen ovale and Patent Ductus Arteriosus. Laryngomalacia. Micrognathia.                                                                                                                                                                                                                                                                                                                                                                |
| M5  | Stereotyped behaviours. Flattened midface. Recessed hairline. Hypertelorism and downward slanting palpebral fissures. Protruding tongue. Widely spaced teeth. Small ears with thickened helices.                                                                                                                                                                                                                                                |
| M6  | Absence of olfactory bulb. Autism. Obsessive compulsive behaviours. Epilepsy (complex partial seizures with secondary generalisation)                                                                                                                                                                                                                                                                                                           |
| GV1 | Severe intermittent isolated congenital neutropenia without recurrent infections. Polyhydramnios. Opposition, withdrawal, and anxiety disorder. Prominent forehead, low-set ears, narrow mouth with an upper labial frenulum, and microretrognathia. Brittle nails. Dental abnormalities (bifid incisors). Anisometropia and astigmatism. MRI showed benign enlargement of the pericerebral areas.                                              |
| ZS1 | Multiple pituitary abnormalities including growth hormone and adrenal insufficiency, and central hypothyroidism. Small anterior pituitary lobe, absent pituitary stalk and ectopic posterior pituitary lobe. Note the presence of two paternally inherited rare variants in two genes that are associated with pituitary pathology. BMP4 (p.R269_L272del) and GLI3 (p.Glu1294Argfs*19). Small mouth with dental crowding. Gastric tube feeding. |
| MU1 |                                                                                                                                                                                                                                                                                                                                                                                                                                                 |
| E1  | Multiple allergies. Small for gestational age. Dysphagia. ASD and PDA. Cortical visual impairment, nystagmus, anisocoria and myopia. Blocked tear duct.                                                                                                                                                                                                                                                                                         |
| S1  | Persistent pulmonary hypertension at birth. Scaphocephaly. Micrognathia. Low set ears. Dental Malocclusions. Myopic astigmatism. Cryptorchidism. Inguinal hernia.                                                                                                                                                                                                                                                                               |
| S2  | Scaphocephaly. Micrognathia. Low set ears. Dental Malocclusions. Mild hearing loss. Repeated hospital admission in infancy with pulmonary infections.                                                                                                                                                                                                                                                                                           |
| S3  | Scaphocephaly. Micrognathia. Low set ears. Laryngomalacia. Atrial septal defect.                                                                                                                                                                                                                                                                                                                                                                |

**Supplemental Table 4: Cardiac lesions found in patients.**

|            |                                                                                                                                     |
|------------|-------------------------------------------------------------------------------------------------------------------------------------|
| Patient 3  | ASD not requiring surgery                                                                                                           |
| Patient 5  | PDA at 7 years of age                                                                                                               |
| Patient 6  | mild pulmonary stenosis                                                                                                             |
| Patient 10 | ASD and PDA and underwent surgery at 2 years of age                                                                                 |
| Patient 12 | VSD not requiring surgery                                                                                                           |
| Patient 13 | mild left pulmonary artery stenosis                                                                                                 |
| Patient 18 | ASD and PDA not requiring surgery                                                                                                   |
| Patient 19 | ASD which required surgery and mild tricuspid and mitral regurgitation                                                              |
| Patient 20 | large ASD, Pulmonary valve stenosis, Cardiomyopathy                                                                                 |
| Patient 22 | PFO resolved                                                                                                                        |
| Patient 23 | PDA                                                                                                                                 |
| Patient 24 | ASD requiring surgical repair                                                                                                       |
| Patient 25 | ASD requiring surgery                                                                                                               |
| Patient 26 | PDA required closure at 12 mths, hypoplastic left pulmonary vein leading to severe pulmonary hypertension with chronic lung disease |
| Patient 27 | ASD, VSD, PDA required surgery                                                                                                      |
| Patient 31 | ASD surgically repaired, VSD not requiring surgery                                                                                  |
| Patient 33 | ASD                                                                                                                                 |
| Patient 34 | PFO resolved                                                                                                                        |
| Patient 36 | VSD, no treatment                                                                                                                   |
| Patient 42 | ASD requiring surgery                                                                                                               |
| Patient 43 | ASD, PDA, Mitral Regurgitation                                                                                                      |
| Patient 44 | ASD                                                                                                                                 |
| Patient 46 | PDA requiring ligation and large ASD requiring surgery                                                                              |
| Patient 52 | ASD, surgical procedure planned                                                                                                     |
| E1         | ASD requiring surgery                                                                                                               |
| M1         | ASD, mitral valve prolapse                                                                                                          |
| M2         | mitral valve prolapse                                                                                                               |
| M4         | PFO and PDA                                                                                                                         |
| A1         | large ASD, repaired at 5yrs                                                                                                         |
| A2         | VSD                                                                                                                                 |
| A4         | ASD                                                                                                                                 |
| T1         | PDA, ASD/surgery                                                                                                                    |
| T2         | PDA, ASD/Catheter                                                                                                                   |
| T3         | PDA, PFO/spontaneous closure                                                                                                        |
| T4         | PDA, ASD, VSD/Surgery                                                                                                               |
| T5         | ASD sec, PDA/Catheter                                                                                                               |
| MU1        | ASD                                                                                                                                 |
| S3         | ASD                                                                                                                                 |

CHD = 38, ASD = 25, VSD = 6, PDA = 14. 36 without known cardiac abnormality

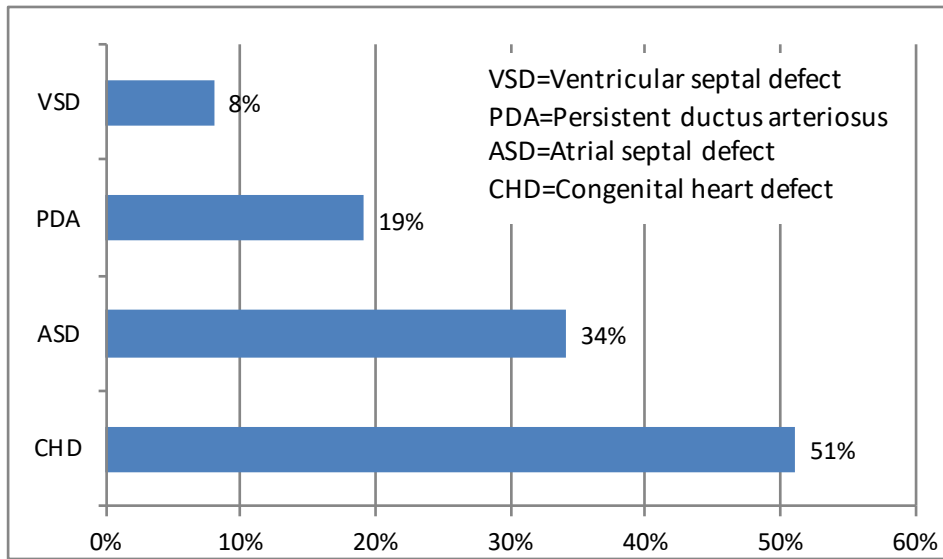

**No cardiac issues**

Patients 1,2,4,7,8,9,11,14,15,16,17,21,28,29,30,32(heart murmur, no treatment ?ECHO),35,37,38, 39, 40, 41, 45,47,48,49, 50,51 GV1,M3,M5,M6,A3, T6, T7 ZS1

**Supplemental Table 5: ID numbers for patients in our co-hort that are registered on decipher (this includes many patients recruited through the DDD study).**

| <b>Patient Number</b> | <b>Decipher ID</b> |
|-----------------------|--------------------|
| 1                     | 259417             |
| 2                     | 261878             |
| 3                     | 264529             |
| 4                     | 273922             |
| 5                     | 276224             |
| 6                     | 279139             |
| 7                     | 332285             |
| 8                     | 336836             |
| 9                     | 279703             |
| 10                    | 273855             |
| 11                    | 285727             |
| 15                    | 259354             |
| 16                    | 281174             |
| 17                    | 290996             |
| 45                    | 291405             |
| 46                    | 293926             |



**Supplementary table 6 – Comparison between the prevalence of features for the previously reported and newly reported patients**

| Feature                 | Previously reported cases (24) | Newly reported cases (52) | Total cases (76)            |
|-------------------------|--------------------------------|---------------------------|-----------------------------|
| Sex                     | F=13 M=11                      | F=24 M=28                 | F=37 M=39                   |
| Mutation type           | Fs=8 n=13 m=1<br>s=1 del=1     | Fs=21 n=23<br>m=5 s=3     | Fs=29 n=36 m=6<br>s=4 del=1 |
| SGA                     | 17% (3/18)                     | 15% (7/48)                | 15% (10/66)                 |
| Microcephaly            | 42% (10/24)                    | 26% (12/46)               | 31% (22/70)                 |
| Presence of ID          | 100% (24/24)                   | 100% (45/45)              | 100% (69/69)                |
| Neonatal Hypotonia      | 92% (22/24)                    | 69% (35/51)               | 76% (57/75)                 |
| Seizures                | 13% (3/23)                     | 8% (4/51)                 | 9% (7/74)                   |
| Speech delay            | 100% (23/23)                   | 100% (48/48)              | 100% (71/71)                |
| Strabismus              | 52% (12/23)                    | 54% (26/48)               | 54% (38/71)                 |
| Ptosis                  | 29% (7/24)                     | 10% (5/49)                | 16% (12/73)                 |
| Visual Defect           | 64% (9/14)                     | 63% (29/46)               | 63% (38/60)                 |
| Broad nasal tip         | 100% (19/19)                   | 80% (38/48)               | 85% (57/67)                 |
| Thin upper lip          | 89% (16/18)                    | 58% (26/45)               | 67% (42/63)                 |
| Feeding difficulties    | 81% (17/21)                    | 76% (39/51)               | 78% (56/72)                 |
| Reflux                  | 75% (12/16)                    | 55% (27/49)               | 60% (38/60)                 |
| Constipation            | 43% (3/7)                      | 52% (24/46)               | 51% (27/53)                 |
| Congenital heart defect | 64% (14/22)                    | 46% (24/52)               | 51% (38/74)                 |
| Frequent Infection      | Reported in 6                  | 47% (23/49)               | 47% (23/49)*                |
| Behavioural problems    | Reported in 3                  | 39% (14/36)               | 39% (14/36)*                |
| Sleep disturbance       | Reported in 3                  | 37% (17/46)               | 37% (17/46)*                |

Phenotype Data Sources

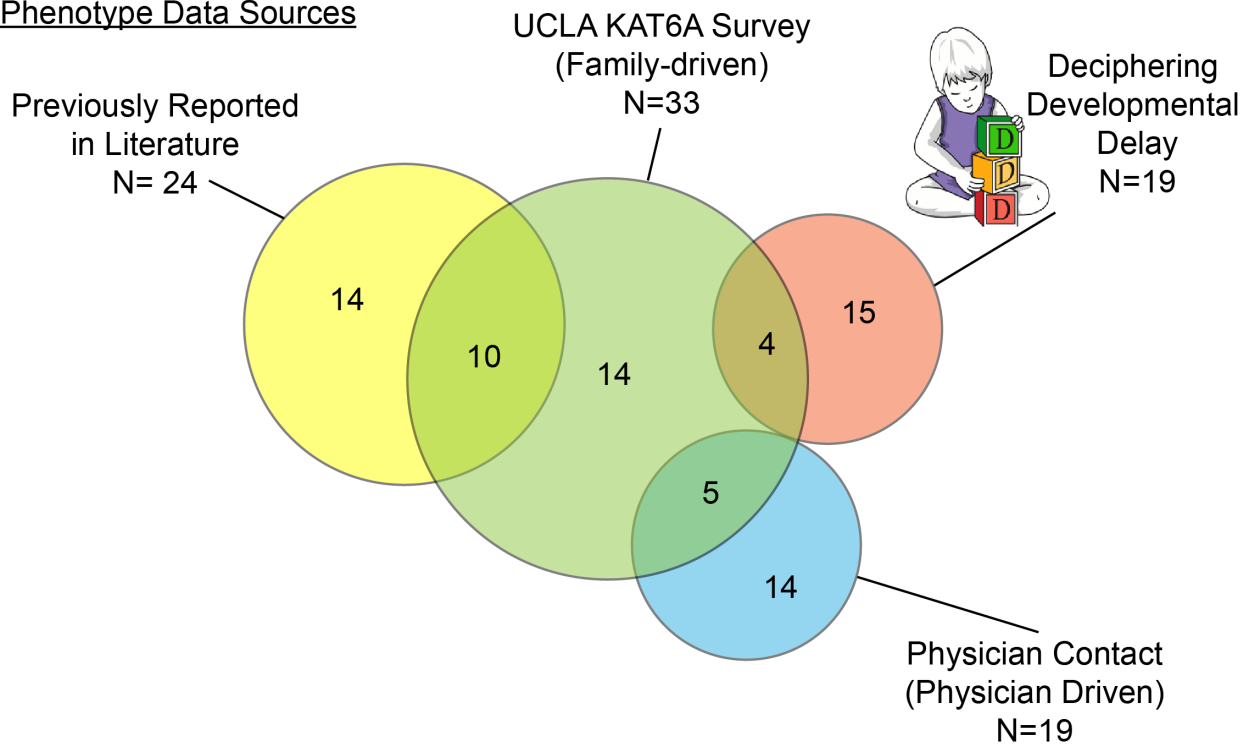

**Supplemental Figure 1:** Data collection sources. Multiple parallel data collection methods allowed for multiple sources of phenotypic data per individual. Several patient were identified through duplicate methods, however we were able to collect sufficient information to identify these duplicates and merge their records.

Missense Cluster Position, p.352-397

|            |            |            |             |            |            |     |           |
|------------|------------|------------|-------------|------------|------------|-----|-----------|
| FSKVRTGPGR | GRKRK----- | -----ITIS  | SQSASSSSEE  | GYLERIDGLD | FCRD----SN | 397 | HUMAN     |
| FSKVRTGPGR | GRKRK----- | -----ITIS  | SQSASSSSEE  | GYLERIDGLD | FCRD----SN | 397 | CHIMP     |
| FSKVRTGPGR | GRKRK----- | -----ITIS  | SQSA--SSSEE | GYLEQIDGLD | FCRD----GS | 397 | BOVINE    |
| FSKVRTGPGR | GRKRK----- | -----ITVS  | SQSA--SSSEE | GYLERIDGLD | FCRD----SN | 396 | MOUSE     |
| FSKVRTGPGR | GRKRK----- | -----ITVS  | SQSA--SSSEE | GYLERIDGLD | FCRD----SS | 396 | RAT       |
| FSKVRTGPGR | GRKRK----- | -----ITIS  | SQSA--SSEG  | GYLEQTDMLD | YCRD----GS | 396 | CHICKEN   |
| FKKIRGG-GR | GRRRRGAEGV | DQCSQGSSSP | HSSS--SSSCE | GYPGDDRMLF | SLRE-DDFSH | 423 | DAN RERIO |
| FKKLA---LR | GRRKR----- | -----SASA  | NSSS--SSSCE | GYPGDDRLLF | SQRDDDDLSQ | 422 | TAKRU     |
| *. *: *    | * *: :     | :          | . *: **     | **         | *          | * : | .         |

Missense Cluster, Position 643

|            |            |            |            |            |     |           |
|------------|------------|------------|------------|------------|-----|-----------|
| FSKEKHCQOK | YNVSCIMILP | QYQRKGYGRF | LIDFSYLLSK | REGQAGSPEK | 681 | HUMAN     |
| FSKEKHCQOK | YNVSCIMILP | QYQRKGYGRF | LIDFSYLLSK | REGQAGSPEK | 681 | CHIMP     |
| FSKEKHCQOK | YNVSCIMILP | QYQRKGYGRF | LIDFSYLLSK | REGQAGSPEK | 680 | BOVINE    |
| FSKEKHCQOK | YNVSCIMILP | QYQRKGYGRF | LIDFSYLLSK | REGQAGSPEK | 680 | MOUSE     |
| FSKEKHCQOK | YNVSCIMILP | QYQRKGYGRF | LIDFSYLLSK | REGQAGSPEK | 679 | RAT       |
| FSKEKHCQOK | YNVSCIMILP | QYQRKGYGRF | LIDFSYLLSK | REGQAGSPEK | 682 | CHICK     |
| FSKEKHCQOK | YNVSCIMILP | QYQRKGYGRF | LIDFSYLLSK | REGQPGSPEK | 706 | DAN RERIO |
| FSKEKHCQOK | YNVSCIMILP | QYQRKGYGRF | LIDFSYLLSK | REGQPGSPEK | 719 | TAKRU     |
| *****      | *****      | *****      | *****      | ****.***** |     |           |

Missense Cluster Position 895

|            |            |            |             |             |     |           |
|------------|------------|------------|-------------|-------------|-----|-----------|
| -----RKN   | RKTQERFGDK | DSKLLLEETS | SAPQEQYGEC  | GEKSEATQEQ  | 912 | HUMAN     |
| -----RKN   | RKTQERFGDK | DSKLLLEETS | SAPQEQYGEC  | E EKSEATQEE | 912 | CHIMP     |
| -----RKN   | RKAQERFGDK | DPKLLLEET- | SAPQEQYGDC  | E EKSEPSQEQ | 911 | BOVINE    |
| -----RKN   | RKTQERFGDK | DSKMLVDETL | SASQEQYGDC  | E EKSETSQER | 914 | MOUSE     |
| -----RKN   | RKTQERFGDK | DSKMLVGETL | STSQEQYGEC  | E EKSAASRER | 913 | RAT       |
| -----RKG   | KKLREPFCEK | EPVLPIDKVV | AIPSERCSEC  | E EKSAVSRGR | 915 | CHICK     |
| RTVPARPRKL | KITGDEDDDD | DDDDEVEDD- | ---DEEEEEEE | E EDERTGINK | 957 | DAN RERIO |
| -TTGASTQKL | ALGKDETEDE | DEDD---DD- | ---DDEDDDE  | E DD-----   | 915 | TAKRU     |
| :*         | :          | ::         | :           | :           | .:. | ::        |

Missense cluster Position 1524-1573

|            |            |            |            |            |      |           |
|------------|------------|------------|------------|------------|------|-----------|
| MQNMETSPMM | DVPSVSDHSQ | QVVDSGFSDL | GSIESTTENY | ENPSSYDSTM | 1573 | HUMAN     |
| MQNMETSPMM | DVPSVSDHSQ | QVVDSGFSDL | GSIESTTENY | ENPSSYDSTM | 1573 | CHIMP     |
| MQNMETSPMM | DVPSVSDHSQ | QVVDSGFSDL | GSIESTTENY | ENPSSYDSTM | 1583 | BOVINE    |
| MQNMETSPMM | DVPSVSDHSQ | QVVDSGFSDL | GSIESTTENY | ENPSSYDSTM | 1567 | MOUSE     |
| MQNMETSPMM | DVPSVSDHSQ | QVVDSGFSDL | GSIESTTENY | ENPSSYDSTM | 1566 | RAT       |
| MQNMETSPMM | DVPSVSDHSQ | QVVDSGFSDL | GSIESTTENY | ENPSSYDSTM | 1581 | CHICKEN   |
| LQNMETSPMM | DVPSVSDHSQ | QVVDSGFSDL | GSIESTTENY | DNPSSYDSTM | 1788 | DAN RERIO |
| QQNMETSPMM | DVPSVSDHSQ | QVVDSGFSDL | GSIESTTENY | DNPSSYDSTM | 1506 | TAKRU     |
| *****      | *****      | *****      | *****      | .*****     |      |           |

**Supplemental Figure 2:** Amino acid conservation across multiple species at locations with missense mutations in *KAT6A*, outlined by the red boxes, show that these residues tend to be highly conserved and are indicated by an asterisk. All *KAT6A* missense mutations affect highly conserved residues. A colon indicates conservation between groups of strongly similar properties, and a period indicates conservation between groups of weakly similar properties.

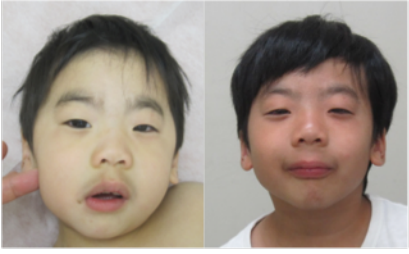

Patient 14

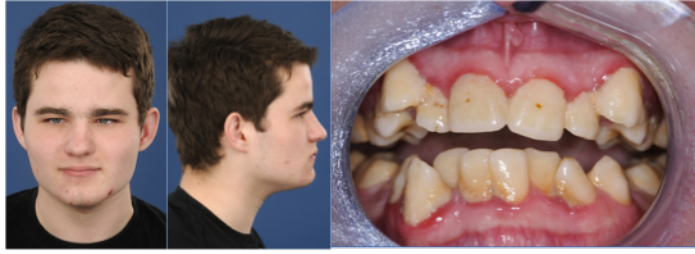

Patient 38

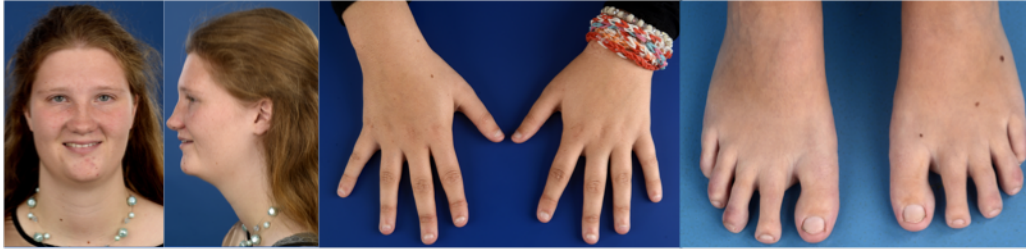

Patient 37

**Supplemental Figure 3:** We included three additional photos of patients with KAT6A syndrome here.

## **Supplemental Methods for cDNA Sequencing for confirmation of functional effect of splice changes in Patient 17.**

Agarose gel electrophoresis of *KAT6A* amplicons were generated for both the Patient 17 with the *KAT6A* heterozygous variant c.1364-2A>T and an unaffected familial control displayed bands equivalent to the expected size (377bp) of the WT transcript (NM\_006766.4) in both instances. Sequencing of total PCR for amplicons generated for the unaffected familial control confirmed this band to be homologous to the WT *KAT6A* sequence. A secondary band was visible in amplicons generated for the affected c.[1364-2A>T];[=] patient, sequencing of total PCR displayed this to represent a transcript with a deletion of the first 8bp of exon 8. Due to the high homology displayed between the WT and mutant transcript it is likely that the upward location of the 8bp shorter mutant transcript is due to heteroduplex formation between the WT and mutant transcript.

## **Supplemental Methods for RNA extraction.**

### **Nucleic acid extraction**

Peripheral blood was supplied in PAXgene (Preanalytix-Qiagen) RNA stabilisation tubes. RNA was extracted using an RNeasy mini kit (Qiagen) and an automated protocol on the Qiacube® (Qiagen) as according to the manufacturer's instructions. RNA was stored at -80 °C.

### **cDNA synthesis**

cDNA was synthesised using a High Capacity cDNA RT kit (Thermo Fisher Scientific) in a total volume of 50 µL, with the addition of n of 1.0 U/µl RNA inhibitor, as according to the manufacturers instruction's. cDNA was stored at -20 °C.

### **PCR and sequencing**

All PCR was conducted using Phusion® DNA polymerase as according to the manufacturer's instructions; annealing temp 58°C, 15 s extension (*KAT6A* fwd 5' GATGGCTTGGACTTCTGCAG 3', *KAT6A* rev 5' TCAATGACAGAGGGACAGCG 3'. Primers were designed using Primer3 (<http://primer3.ut.ee/>) and SNP checked using SNPcheck3 (NGRL Manchester). Total PCR was sequenced using the BigDye® Terminator kit v3.1 (Applied Biosystems) and analysed using an ABI 3730 DNA sequencer (Applied

Biosystems). Sequence analysis was conducted using Mutation Surveyor® (SoftGenetics) and the Sequence Scanner Software 2.0 (Applied Biosystems). PCR amplicons were run on a 3% agarose gel (50:50 Nusieve (Lonza): Agarose MP (Roche)) and 1x TBE buffer at 90v for 120 minutes. Amplicons were sized against 5µl of 50bp GeneRuler ladder (Thermo Fisher Scientific).

#### REFERENCES CITED

1. Tham, E., et al., *Dominant mutations in KAT6A cause intellectual disability with recognizable syndromic features*. Am J Hum Genet, 2015. **96**(3): p. 507-13.
2. Arboleda, V.A., et al., *De novo nonsense mutations in KAT6A, a lysine acetyl-transferase gene, cause a syndrome including microcephaly and global developmental delay*. Am J Hum Genet, 2015. **96**(3): p. 498-506.
3. Millan, F., et al., *Whole exome sequencing reveals de novo pathogenic variants in KAT6A as a cause of a neurodevelopmental disorder*. Am J Med Genet A, 2016. **170**(7): p. 1791-8.
4. Gauthier-Vasserot, A., et al., *Application of whole-exome sequencing to unravel the molecular basis of undiagnosed syndromic congenital neutropenia with intellectual disability*. Am J Med Genet A, 2017. **173**(1): p. 62-71.
5. Murray, C.R., et al., *Novel Causative Variants in DYRK1A, KARS, and KAT6A Associated with Intellectual Disability and Additional Phenotypic Features*. J Pediatr Genet, 2017. **6**(2): p. 77-83.
6. Elenius, V., et al., *Food allergy in a child with de novo KAT6A mutation*. Clin Transl Allergy, 2017. **7**: p. 19.
7. Zwaveling-Soonawala, N., et al., *Variants in KAT6A and pituitary anomalies*. Am J Med Genet A, 2017. **173**(9): p. 2562-2565.
8. Chisei Satoh, R.M., Akira Kinoshita, Hiroyuki Mishima, Michiko Doi, Mutsuko Miyazaki, Masafumi Fukuda, Haruo Takahashi, Tatsuro Kondoh & Koh-ichiro Yoshiura, *Three brothers with a nonsense mutation in KAT6A caused by parental germline mosaicism*. Human Genome Variation, (4): p. 17045.
